# Supplementary material
Source: publisher figshare collection journal article supplement (https://acs.figshare.com/ndownloader/files/14497001)
Supplement: Supplementary file 1 [file 14497001]

**Supporting information on**

**Confinement induced alteration of morphologies of oil-water emulsion**

**Soumita Maiti<sup>1</sup>, Nitish Singh<sup>1,\*</sup>, Animangsu Ghatak<sup>1,2,\*</sup>**

- [1] Department of Chemical Engineering, Indian Institute of Technology Kanpur, 208016  
[2] Center for Environmental Science and Engineering, Indian Institute of Technology Kanpur, 208016 (India)  
[\*] Prof. A. Ghatak, Corresponding-Author, Author-Three, E-mail: [aghatak@iitk.ac.in](mailto:aghatak@iitk.ac.in)  
Nitish Singh, Corresponding-Author, Author-Two, E-mail: [nitishrs@iitk.ac.in](mailto:nitishrs@iitk.ac.in)

**Number of pages: 6**

**Number of Figures: 2**

**Number of Tables: 2**

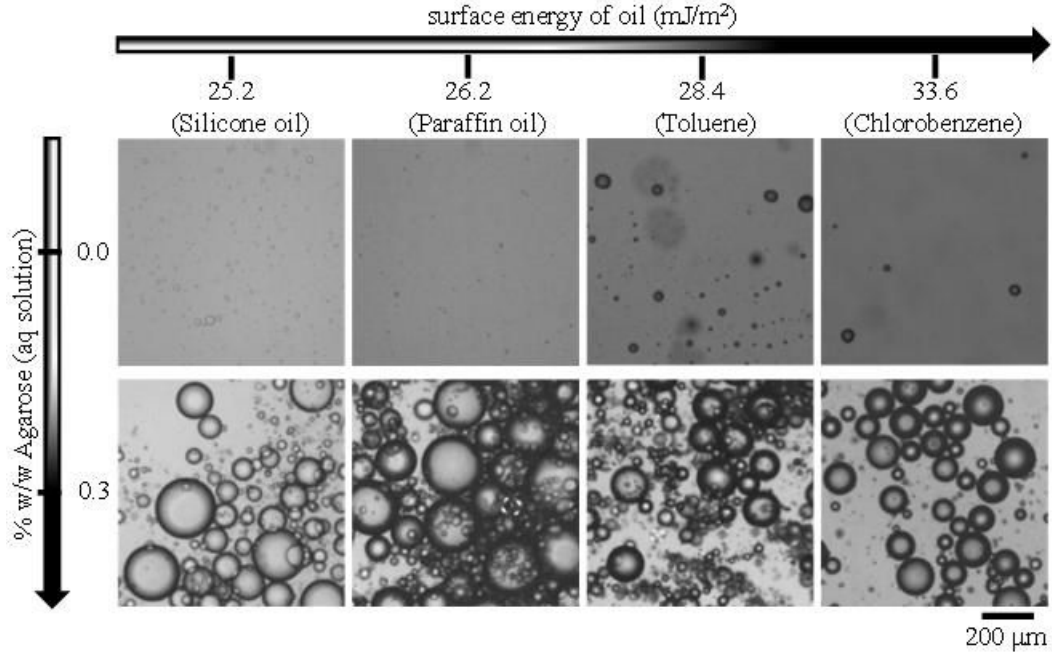

**Figure S1:** Oils of different surface tension are dispersed in DI water in absence and in presence of Agarose.

**Estimation of surface energy of polystyrene and glass cover slip:** Equation 1, when combined with the Young's equation results in the following equation:

$$(1 + \cos \theta) \gamma_1 = (1 + \cos \theta) (\gamma_1^d + \gamma_1^p) = 2 \left[ \sqrt{\gamma_1^d \gamma_2^d} + \sqrt{\gamma_1^p \gamma_2^p} \right] \quad \text{Eq. S1}$$

In order to determine the surface energy of Polystyrene (PS), sessile drops (10  $\mu\text{L}$ ) of water and Pentadecane (PD) were placed on this surface and the respective static equilibrium contact angles were measured. For water and PD, these angles were obtained as  $\theta_{\text{Water-PS}} = 91.7^\circ$  and  $\theta_{\text{PD-PS}} = 23.6^\circ$  respectively. The dispersive and polar components of surface tension for water are,  $\gamma_{\text{Water}}^d = 21.8 \text{ mN/M}$  and  $\gamma_{\text{Water}}^p = 51 \text{ mN/M}$ , whereas that for PD are  $\gamma_{\text{PD}}^d = 27.1 \text{ mN/M}$  and  $\gamma_{\text{PD}}^p = 0 \text{ mN/M}$  respectively. Using these values of surface tension and contact angles in equation 1, one obtains the following set of equations:

$$(1 + \cos 91.7^\circ)(21.8 + 51.0) = 2 \left[ \sqrt{21.8 \times \gamma_{PS}^d} + \sqrt{51.0 \times \gamma_{PS}^p} \right] \quad \text{Eq. S2}$$

$$(1 + \cos 23.6^\circ)(27.1 + 0) = 2 \left[ \sqrt{27.1 \times \gamma_{PS}^d} + \sqrt{0 \times \gamma_{PS}^p} \right] \quad \text{Eq. S3}$$

Equations S2 and S3 are solved simultaneously to determine surface tension of polystyrene as,  $\gamma_{PS} = 27.7 \text{ mN/m}$  ( $\gamma_{PS}^d = 24.9 \text{ mN/m}$ ,  $\gamma_{PS}^p = 2.83 \text{ mN/m}$ ).

Similarly, for the determination of surface tension of Glass Cover Slip (CS), drops of water and Nitromethane (NM) ( $\gamma_{NM}^d = 22 \text{ mN/M}$  and  $\gamma_{NM}^p = 14.5 \text{ mN/M}$ ) were placed on this surface and the respective contact angles were measured as,  $\theta_{\text{Water-Glass}} = 47.7^\circ$  and  $\theta_{\text{NM-Glass}} = 38.3^\circ$  respectively which resulted in the following equations:

$$(1 + \cos 47.7^\circ)(21.8 + 51.0) = 2 \left[ \sqrt{21.8 \times \gamma_{CS}^d} + \sqrt{51.0 \times \gamma_{CS}^p} \right] \quad \text{Eq. S4}$$

$$(1 + \cos 38.3^\circ)(22.0 + 14.5) = 2 \left[ \sqrt{22.0 \times \gamma_{CS}^d} + \sqrt{14.5 \times \gamma_{CS}^p} \right] \quad \text{Eq. S5}$$

Simultaneous solution of equations S4 and S5 give surface tension of Glass Cover Slip as  $\gamma_{CS} = 72.13 \text{ mN/m}$  ( $\gamma_{CS}^d = 0.003 \text{ mN/m}$ ,  $\gamma_{CS}^p = 72.13 \text{ mN/m}$ ).

**Estimation of surface tension of aq-Agarose solution:** Using the PS and CS surfaces, it was possible to obtain the surface tension of other liquids e.g. aqueous solution of aq-Agarose (0.01% w/w Agarose in water). A 10  $\mu\text{l}$  sessile drop of aq-Agarose (pH = 7), was found to form contact angles:  $\theta_{\text{Ag-PS}} = 87.42^\circ$ ,  $\theta_{\text{Ag-CS}} = 49.2^\circ$  on PS and CS surfaces respectively, using which the surface tension of aq-Agarose was calculated as  $\gamma_{Ag} = 68.57 \text{ mJ/m}^2$ .

### Estimation of surface and interfacial tension of different liquids:

| Pair of liquids                                  | Aqueous solution of Agarose (0.1%)                                                | Paraffin oil                                                                      | Silicone oil                                                                      | Paraffin oil & Agarose solution                                                    | Silicone oil & Agarose solution                                                     | Paraffin oil & Silicone oil                                                         |
|--------------------------------------------------|-----------------------------------------------------------------------------------|-----------------------------------------------------------------------------------|-----------------------------------------------------------------------------------|------------------------------------------------------------------------------------|-------------------------------------------------------------------------------------|-------------------------------------------------------------------------------------|
| Image                                            |  |  |  |  |  |  |
| Drop phase                                       | Aqueous solution of Agarose (0.1%)                                                | Paraffin oil                                                                      | Silicone oil                                                                      | Aqueous solution of Agarose (0.1%)                                                 | Aqueous solution of Agarose (0.1%)                                                  | Silicone oil                                                                        |
| Drop volume ( $\mu\text{L}$ )                    | 28.8                                                                              | 9.1                                                                               | 7.4                                                                               | 74.7                                                                               | 176.9                                                                               | 0.9                                                                                 |
| Ambient                                          | Air                                                                               | Air                                                                               | Air                                                                               | Paraffin oil                                                                       | Silicone oil                                                                        | Paraffin oil                                                                        |
| $\gamma(\text{mN/m})$ (Pendant drop method)      | $63.8 \pm 0.23$                                                                   | $25.5 \pm 0.96$                                                                   | $24.6 \pm 0.70$                                                                   | $39.6 \pm 0.90$                                                                    | $29.7 \pm 0.79$                                                                     | $0.72 \pm 0.083$                                                                    |
| $\gamma(\text{mN/m})$ (Owens and Wendt equation) | 63.0                                                                              | 25.5                                                                              | 24.3                                                                              | 39.7                                                                               | 29.7                                                                                | 0.78                                                                                |

**Table S1.** Surface and interfacial tension of different liquids estimated experimentally using pendant drop method (data presented in last but one row) and by using Owens and Wendt equation (last row).

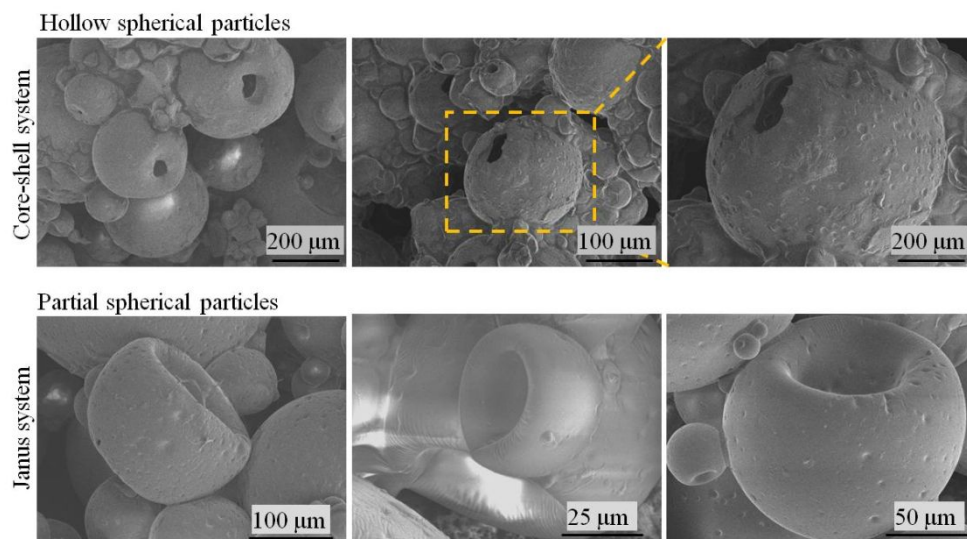

**Figure S2.** SEM images of PDMS particles generated from core-shell and Janus morphology.

Figure S2 shows the detail view of SEM images of particles generated from Core-shell and Janus morphology. In each case, particles of all diameter were of the similar type. The images did not show occurrence of even a single solid sphere. Even the very small particles, as highlighted by a dashed square in the image, are not complete sphere.

**Estimation of surface tension of aq-SDS (1 mM) and aq-CTAB (0.01 mM) solution:**

| Solid surface used                                   | SDS (1 mM)                                                                                                                  | CTAB (0.01 mM)                                                                                                                 |
|------------------------------------------------------|-----------------------------------------------------------------------------------------------------------------------------|--------------------------------------------------------------------------------------------------------------------------------|
| cover slip<br>( $\gamma_{CS} = 72.13 \text{ mN/m}$ ) |                                            |                                             |
| Polystyrene<br>( $\gamma_{PS} = 27.7 \text{ mN/m}$ ) |                                            |                                             |
| Contact angle                                        | $\theta_{SDS-CS} = 39.7^{\circ}$                                                                                            | $\theta_{CTAB-CS} = 38.8^{\circ}$                                                                                              |
|                                                      | $\theta_{SDS-PS} = 85.3^{\circ}$                                                                                            | $\theta_{CTAB-PS} = 85.9^{\circ}$                                                                                              |
| Surface tension<br>(calculated using equation 2)     | $\gamma_{SDS} = 61.88 \text{ mN/m}$<br>( $\gamma_{SDS}^d = 20.68 \text{ mN/m}$ ,<br>$\gamma_{SDS}^p = 41.19 \text{ mN/m}$ ) | $\gamma_{CTAB} = 62.11 \text{ mN/m}$<br>( $\gamma_{CTAB}^d = 20.16 \text{ mN/m}$ ,<br>$\gamma_{CTAB}^p = 41.94 \text{ mN/m}$ ) |
| Interfacial tension<br>(calculated using equation 1) | $\gamma_{Si-SDS} = 30.42 \text{ mN/m}$                                                                                      | $\gamma_{Si-CTAB} = 31.09 \text{ mN/m}$                                                                                        |
|                                                      | $\gamma_{Par-SDS} = 40.74 \text{ mN/m}$                                                                                     | $\gamma_{Par-CTAB} = 41.54 \text{ mN/m}$                                                                                       |
| Difference in interfacial tension                    | $\gamma_{Par-SDS} - \gamma_{Si-SDS} = 10.32 \text{ mN/m}$                                                                   | $\gamma_{Par-SDS} - \gamma_{Si-SDS} = 10.45 \text{ mN/m}$                                                                      |

**Table S2.** Estimation of surface tension of aq-SDS (1 mM) and aq-CTAB (0.01 mM) solution.
